# Supplementary material for: Modulatory Effect of Chlorogenic Acid and Coffee Extracts on Wnt/β-Catenin Pathway in Colorectal Cancer Cells
Source: MDPI journal article supplement (doi:10.3390/nu14224880), 2022-11-18
Supplement: s1 [file s1]

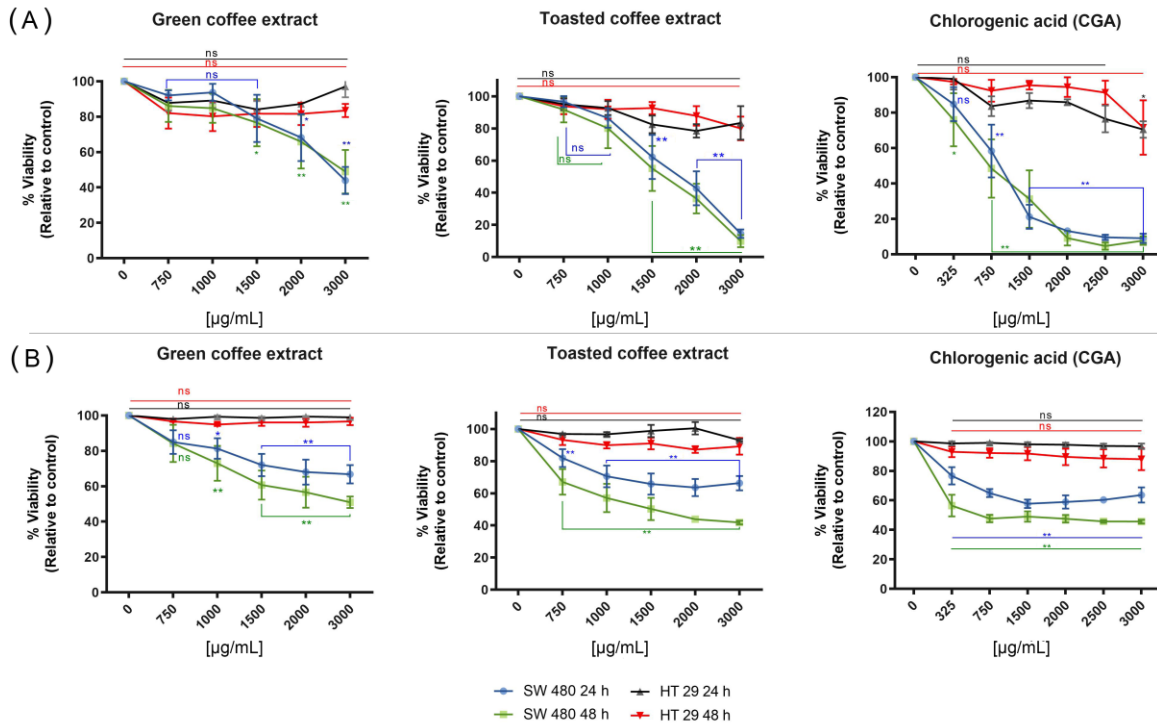

**Supplementary Figure S1.** Cytotoxicity activity measured by MTT (A) and SRB (B) in the colorectal cancer cell lines SW480 and HT-29 at 24-48 h. Values are expressed as mean  $\pm$  SEM of at least three independent experiments. Two-way ANOVA, difference to non-treated cells, \*  $p \leq 0.05$ , \*\*  $p \leq 0.01$ .
